# Supplementary material
Source: HighWire-hosted journal article supplement (https://cmaj.ca/highwire/filestream/57924/field_highwire_adjunct_files/4/elect-holbrook-app_5.pdf)
Supplement: elect-holbrook-app_5.pdf [file elect-holbrook-app_5.pdf]

**Appendix 5: Computerization of Medical Practices for the Enhancement of Therapeutic Effectiveness (COMPETE) II study investigators**

- Anne Holbrook (principal investigator), Division of Clinical Pharmacology and Therapeutics, McMaster University, Hamilton, Ont.
- Lisa Dolovich, Department of Family Medicine, McMaster University, Hamilton, Ont.
- Hui Lee (deceased), Group Health Centre, Sault Ste. Marie, Ont.
- Robert Bernstein, Department of Family Medicine, University of Toronto, Toronto, Ont.
- David Chan, Department of Family Medicine, McMaster University, Hamilton, Ont.
- Hertzell Gerstein, Department of Medicine, McMaster University, Hamilton, Ont.
- Dereck Hunt, Department of Medicine, McMaster University, Hamilton, Ont.
- Rolf Sebaldt, Department of Medicine, McMaster University, Hamilton, Ont.
- Karim Keshavjee, InfoClin, Toronto, Ont.
- Lehana Thabane, Department of Clinical Epidemiology and Biostatistics, McMaster University, Hamilton, Ont.
